# Supplementary material for: Starch esterification using deep eutectic solvents as chaotropic agents and reaction promoters
Source: Royal Society of Chemistry journal article supplement (doi:10.1039/d3gc02833j), 2024-01-01

## Starch esterification using deep eutectic solvents as chaotropic agents and reaction promoters

Guillermo A. Portillo-Perez, Kasper B. Skov, Mario M. Martinez

### *Supplementary information*

**Table S1.** Experimental design setup for starch acetylation. AA:starch: molar ratio of acetic anhydride to starch, Starch load: amount of wheat starch added to the reaction.

| Run No. | Time (h) | Temperature (°C) | AA:Starch | Starch load(g) |
|---------|----------|------------------|-----------|----------------|
| 1       | 5        | 120              | 15        | 0.25           |
| 2       | 7        | 130              | 20        | 0.50           |
| 3       | 3        | 130              | 20        | 0.50           |
| 4       | 7        | 110              | 20        | 0.50           |
| 5       | 7        | 130              | 10        | 0.50           |
| 6       | 3        | 110              | 20        | 0.50           |
| 7       | 3        | 130              | 10        | 0.50           |
| 8       | 7        | 110              | 10        | 0.50           |
| 9       | 3        | 110              | 10        | 0.50           |
| 10      | 9        | 120              | 15        | 0.75           |
| 11      | 1        | 120              | 15        | 0.75           |
| 12a     | 5        | 120              | 15        | 0.75           |
| 12b     | 5        | 120              | 15        | 0.75           |
| 12c     | 5        | 120              | 15        | 0.75           |
| 12d     | 5        | 120              | 15        | 0.75           |
| 12e     | 5        | 120              | 15        | 0.75           |
| 13      | 5        | 120              | 25        | 0.75           |
| 14      | 5        | 120              | 5         | 0.75           |
| 15      | 5        | 140              | 15        | 0.75           |
| 16      | 5        | 100              | 15        | 0.75           |
| 17      | 7        | 130              | 20        | 1.00           |
| 18      | 3        | 130              | 20        | 1.00           |
| 19      | 7        | 110              | 20        | 1.00           |
| 20      | 7        | 130              | 10        | 1.00           |
| 21      | 3        | 110              | 20        | 1.00           |
| 22      | 3        | 130              | 10        | 1.00           |
| 23      | 7        | 110              | 10        | 1.00           |
| 24      | 3        | 110              | 10        | 1.00           |
| 25      | 5        | 120              | 15        | 1.25           |

**Table S2.** FTIR data for starch and acetylated wheat starch.

| Band assignment        | Wavenumber (cm <sup>-1</sup> ) |        |        |        |        |        |
|------------------------|--------------------------------|--------|--------|--------|--------|--------|
|                        | Starch                         | AcS-1h | AcS-2h | AcS-3h | AcS-4h | AcS-5h |
| primary N-H            |                                | 3374   | 3374   |        |        |        |
|                        |                                | 3327   | 3327   |        |        |        |
| alcohol OH             | 3275                           |        |        |        |        |        |
|                        | 1141                           |        |        |        |        |        |
| secondary N-H          |                                | 3213   | 3213   |        |        |        |
| alkane C-H             | 2920                           | 2958   | 2958   | 2958   | 2958   | 2958   |
| ester C=O              |                                | 1733   | 1733   | 1733   | 1733   | 1733   |
| secondary amide<br>C=O |                                | 1662   | 1662   |        |        |        |
| methyl C-H             |                                | 1415   | 1415   | 1415   | 1415   | 1415   |
|                        |                                | 1367   | 1367   | 1367   | 1367   | 1367   |
| C-O-C (ester)          |                                | 1244   | 1244   | 1215   | 1215   | 1215   |
| C-O-C (acetal)         | 990                            | 1024   | 1024   | 1024   | 1024   | 1024   |

AcS, acetylated wheat starch; AA: Acetic anhydride, S, starch. Reaction conditions: Temp: 120 °C, AA: S: 15, S load: 1.25 g. Reaction was monitored every hour over 5 h.

**Table S3.** Statistical model term values in coded units of hierarchical quadratic model for optimization of the catalyst-free acetylation reaction. AA: Acetic anhydride, S, starch.

| Term                    | Estimate | Std Error | t Ratio | Prob> t |
|-------------------------|----------|-----------|---------|---------|
| Intercept               | 2.026    | 0.155124  | 13.06   | <0.0001 |
| Time                    | 0.144583 | 0.070804  | 2.04    | 0.0605  |
| Temperature             | 0.26875  | 0.070804  | 3.8     | 0.002   |
| AA:S                    | 0.680417 | 0.070804  | 9.61    | <0.0001 |
| S                       | 0.64375  | 0.070804  | 9.09    | <0.0001 |
| Time*Temperature        | -0.00188 | 0.086717  | -0.02   | 0.9831  |
| Time*AA:S               | 0.053125 | 0.086717  | 0.61    | 0.5499  |
| Temperature* AA:S       | 0.016875 | 0.086717  | 0.19    | 0.8485  |
| Time*S                  | -0.00438 | 0.086717  | -0.05   | 0.9605  |
| Temperature*S           | 0.156875 | 0.086717  | 1.81    | 0.092   |
| AA:S *S                 | 0.496875 | 0.086717  | 5.73    | <0.0001 |
| Time*Time               | -0.26202 | 0.068097  | -3.85   | 0.0018  |
| Temperature*Temperature | -0.29202 | 0.068097  | -4.29   | 0.0008  |
| AA:S * AA:S             | -0.17202 | 0.068097  | -2.53   | 0.0242  |
| S*S                     | -0.15202 | 0.068097  | -2.23   | 0.0424  |

**Table S4.**  $R^2$  and adjusted  $R^2$  ( $R^2$  adj) values for hierarchical quadratic model for optimization of the catalyst-free acetylation reaction.

|                        |          |
|------------------------|----------|
| $R^2$                  | 0.935517 |
| $R^2$ Adj              | 0.904972 |
| Root Mean Square Error | 0.334686 |
| Mean of Response       | 1.29931  |
| Observations           | 29       |

**Table S5.** Statistical model term values in coded units of non-hierarchical quadratic model for optimization of the catalyst-free acetylation reaction. AA: Acetic anhydride, S, starch.

| Term                    | Estimate  | Std Error | t Ratio | Prob> t |
|-------------------------|-----------|-----------|---------|---------|
| Intercept               | 2.026     | 0.138825  | 14.59   | <.0001  |
| Time                    | 0.1445833 | 0.063365  | 2.28    | 0.0349  |
| Temperature             | 0.26875   | 0.063365  | 4.24    | 0.0005  |
| AA:S                    | 0.6804167 | 0.063365  | 10.74   | <.0001  |
| S                       | 0.64375   | 0.063365  | 10.16   | <.0001  |
| Temperature*S           | 0.156875  | 0.077606  | 2.02    | 0.0584  |
| AA:S *S                 | 0.496875  | 0.077606  | 6.4     | <.0001  |
| Time*Time               | -0.262021 | 0.060942  | -4.3    | 0.0004  |
| Temperature*Temperature | -0.292021 | 0.060942  | -4.79   | 0.0001  |
| AA:S * AA:S             | -0.172021 | 0.060942  | -2.82   | 0.0113  |
| S*S                     | -0.152021 | 0.060942  | -2.49   | 0.0226  |

**Figure S1.** FTIR spectra of evolved gases from degradation peaks at 290 °C, 320 °C, 350 °C and 390 °C. A: Native wheat starch. B: acetylated wheat starch (AcS-128) produced at the reaction conditions of 128 °C, 0.6 h, acetic anhydride: starch ratio of 20, and starch load of 1.25 g (presenting entrapped urea).

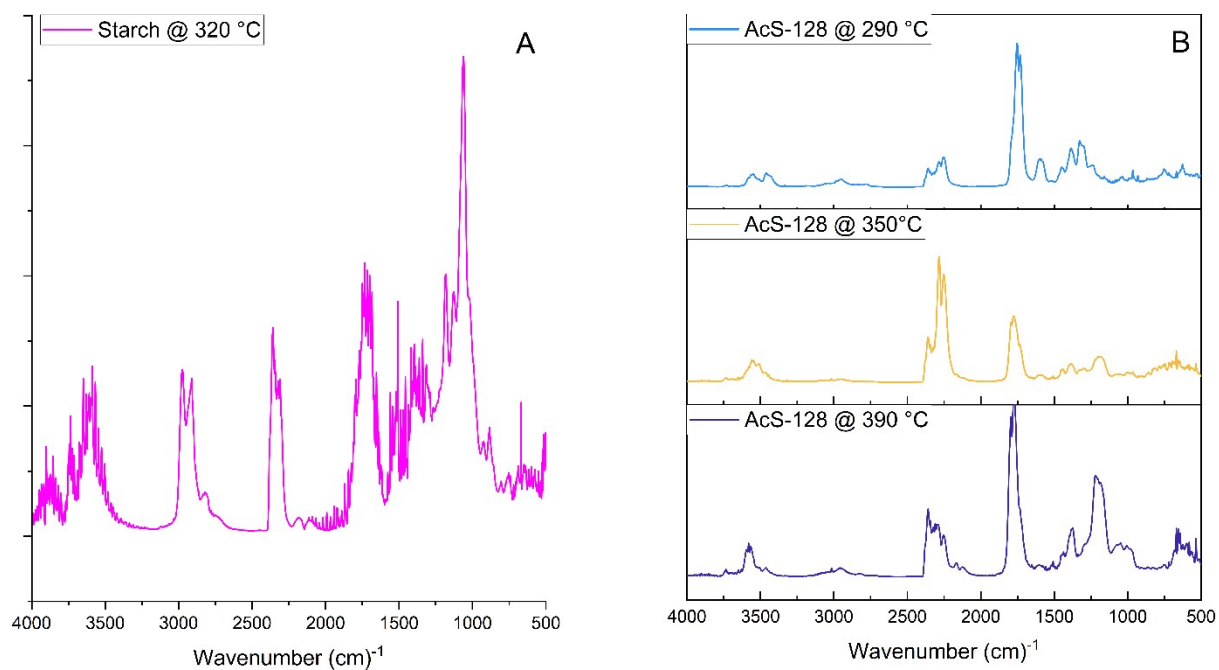

**Figure S2.** SEM images of acetylated wheat starch (AcS) at 120 °C, acetic anhydride: starch ratio of 15, starch load of 1.25 g, for 1 h (A) and 5 h (B).

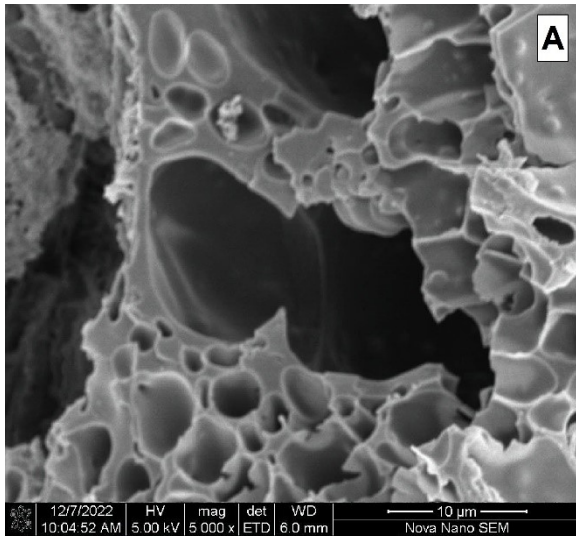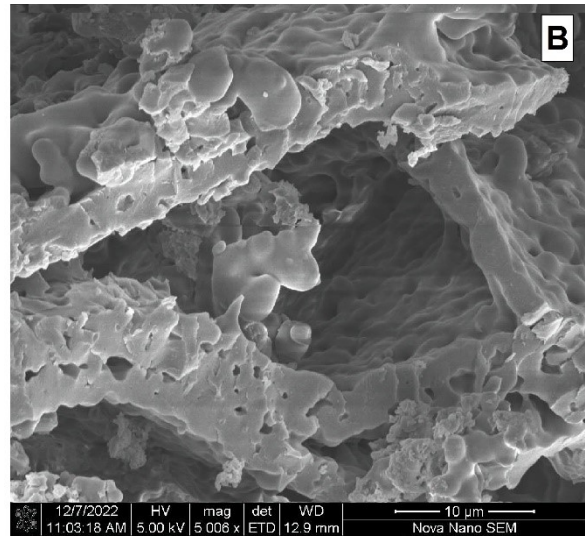

Supplement: d3gc02833j1.pdf [file d3gc02833j1.pdf]
